# Supplementary material for: Ultrahigh-stability SnOX (X = S, Se) nanotubes with a built-in electric field as a highly promising platform for sensing NH3, NO and NO2: a theoretical investigation
Source: Royal Society of Chemistry journal article supplement (doi:10.1039/d2ta00463a), 2022-01-01
Supplement: d2ta00463a1.pdf [file d2ta00463a1.pdf]

**SUPPORTING INFORMATION FOR:**

**Ultrahigh Stable SnOX (X= S, Se) Nanotubes with a Built-in Electric Field as a Highly Promising Platform for Sensing NH<sub>3</sub>, NO and NO<sub>2</sub>: A Theoretical Investigation**

*Renqiang Zhao, Yao Luo, Fan Jiang, Yuxin Dai, Zengying Ma, Junwen Zhong, Peng Wu, Tao Zhou, Yucheng Huang\**

College of Chemistry and Material Science, Key Laboratory of Electrochemical Clean Energy of Anhui Higher Education Institutes, The Key Laboratory of Functional Molecular Solids, Ministry of Education, Anhui Laboratory of Molecule-Based Materials, Anhui Normal University, Wuhu 241000, China

**E-mail:** [huangyc@mail.ahnu.edu.cn](mailto:huangyc@mail.ahnu.edu.cn)

## 1. Hückel Molecular Orbital (HMO) theory to calculate the charge density of $\text{NO}_x$ ( $x = 1, 2$ )

For the isolated  $\text{NO}_x$  ( $x = 1, 2$ ), it always gets the wrong information, e.g., the dipole direction and the charge, from the Gaussian software if one does not choose the appropriate basis sets. In this work, by using HMO theory as referred to the textbook, we give a correct picture that how the information of  $\text{NO}_x$  are.

For  $\text{NO}_2$ , the HMO of  $\Pi$  orbital can be expressed as  $\psi = c_1\varphi_1 + c_2\varphi_2 + c_3\varphi_3$ , here

$\varphi_1, \varphi_2, \varphi_3$  are the  $2p_z$  atomic orbitals (AO). The eigenvalue equation of HMO is:

$$\begin{pmatrix} \alpha_O - E & \beta_{NO} & 0 \\ \beta_{NO} & \alpha_N - E & \beta_{NO} \\ 0 & \beta_{NO} & \alpha_O - E \end{pmatrix} \begin{pmatrix} c_1 \\ c_2 \\ c_3 \end{pmatrix} = \begin{pmatrix} 0 \\ 0 \\ 0 \end{pmatrix}, \text{ it can be deduced to:}$$

$$\begin{pmatrix} \frac{\alpha_O - E}{\beta_{NO}} & 1 & 0 \\ 1 & \frac{\alpha_N - E}{\beta_{NO}} & 1 \\ 0 & 1 & \frac{\alpha_O - E}{\beta_{NO}} \end{pmatrix} \begin{pmatrix} c_1 \\ c_2 \\ c_3 \end{pmatrix} = \begin{pmatrix} 0 \\ 0 \\ 0 \end{pmatrix}. \text{ Assuming } \frac{\alpha_O - E}{\beta_{NO}} = \chi, \quad \frac{\alpha_O - \alpha_N}{\beta_{NO}} = k \quad (k > 0), \text{ so}$$

$\frac{\alpha_N - E}{\beta_{NO}} = \frac{\alpha_O - E}{\beta_{NO}} + \frac{\alpha_N - \alpha_O}{\beta_{NO}} = \chi - k$ . Then, the eigenvalue equation of HMO can be

$$\text{simplified to } \begin{pmatrix} \chi & 1 & 0 \\ 1 & \chi - k & 1 \\ 0 & 1 & \chi \end{pmatrix} \begin{pmatrix} c_1 \\ c_2 \\ c_3 \end{pmatrix} = \begin{pmatrix} 0 \\ 0 \\ 0 \end{pmatrix}. \text{ And the secular determinant is } \begin{vmatrix} \chi & 1 & 0 \\ 1 & \chi - k & 1 \\ 0 & 1 & \chi \end{vmatrix} = 0,$$

thus  $\chi(\chi^2 - k\chi - 2) = 0$ . Solving the equation, we can get

$$\chi_1 = \frac{k - \sqrt{k^2 + 8}}{2} = k' < 0, \quad \chi_2 = 0, \quad \chi_3 = \frac{k + \sqrt{k^2 + 8}}{2} = k'' > 0. \text{ And the HMO energy levels are:}$$

$$\begin{cases} E_1 = \alpha_O - k'\beta_{NO} \\ E_2 = \alpha_O \\ E_3 = \alpha_O - k''\beta_{NO} \end{cases}$$

If we substitute  $\chi_1, \chi_2, \chi_3$  to the HMO determinant equation, and taking the normalization condition into consideration, the HMO orbitals are:

$$\begin{cases} \psi_1 = \frac{1}{\sqrt{2+k'^2}} \cdot (\varphi_1 - k'\varphi_2 + \varphi_3) \\ E_2 = \frac{1}{\sqrt{2}} (\varphi_1 + \varphi_3) \\ \psi_3 = \frac{1}{\sqrt{2+k''^2}} \cdot (\varphi_1 - k''\varphi_2 + \varphi_3) \end{cases}$$

If we assume  $k = 0.276$ , so  $k' = -1.283$ ,  $k'' = 1.559$ , and then:

$$\begin{cases} \psi_1 = 0.524\phi_1 + 0.672\phi_2 + 0.524\phi_3 \\ \psi_2 = 0.707\phi_1 + 0.707\phi_3 \\ \psi_3 = 0.475\phi_1 - 0.741\phi_2 + 0.475\phi_3 \end{cases} \text{ . The pictures of these MO look like:}$$

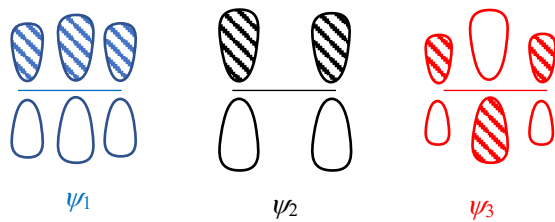

And the electron distribution of  $\Pi_3^3$  looks like:

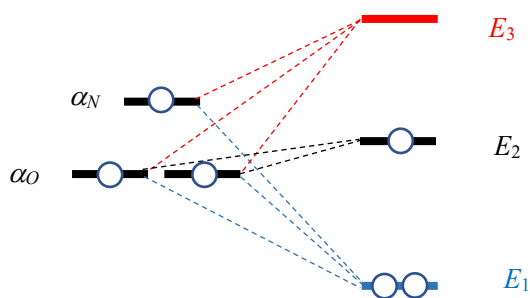

So, we can calculate the charge density of  $\Pi_3^3$ :

$$\begin{cases} \rho_1 = 2c_{11}^2 + c_{21}^2 = 2 \times 0.524^2 + 0.707^2 = 1.048 \\ \rho_2 = 2c_{12}^2 + c_{22}^2 = 2 \times 0.672^2 + 0 = 0.903 \\ \rho_3 = \rho_1 = 1.048 \end{cases}$$

If  $\text{NO}_2$  is dimerized, the  $\Pi$  is always believed as  $\Pi_3^4$ . In this case, the charge density is

$$\begin{cases} \rho_1 = 2c_{11}^2 + 2c_{21}^2 = 2 \times 0.524^2 + 2 \times 0.707^2 = 1.548 \\ \rho_2 = 2c_{12}^2 + 2c_{22}^2 = 2 \times 0.672^2 + 0 = 0.903 \\ \rho_3 = \rho_1 = 1.548 \end{cases}$$

Similarly, for the NO, the  $\pi$ MO is written as  $\psi = c_1\phi_1 + c_2\phi_2$ . Here  $\phi_1, \phi_2$  are the  $2p_x$  AO or  $2p_y$  AO. The eigenvalue equation of HMO is  $\begin{pmatrix} \alpha_N - E & \beta_{NO} \\ \beta_{NO} & \alpha_O - E \end{pmatrix} \begin{pmatrix} c_1 \\ c_2 \end{pmatrix} = \begin{pmatrix} 0 \\ 0 \end{pmatrix}$ , it can be

deduced to  $\begin{pmatrix} \frac{\alpha_N - E}{\beta_{NO}} & 1 \\ 1 & \frac{\alpha_O - E}{\beta_{NO}} \end{pmatrix} \begin{pmatrix} c_1 \\ c_2 \end{pmatrix} = \begin{pmatrix} 0 \\ 0 \end{pmatrix}$ . Assuming  $\frac{\alpha_O - E}{\beta_{NO}} = \chi$ ,  $\frac{\alpha_O - \alpha_N}{\beta_{NO}} = k$  ( $k > 0$ ). So the

eigenvalue equation is simplified to  $\begin{pmatrix} \chi - k & 1 \\ 1 & \chi \end{pmatrix} \begin{pmatrix} c_1 \\ c_2 \end{pmatrix} = \begin{pmatrix} 0 \\ 0 \end{pmatrix}$ . And the HMO determinant

equation is  $\begin{vmatrix} \chi - k & 1 \\ 1 & \chi \end{vmatrix} = 0$ , so we get  $\chi^2 - k\chi - 1 = 0$ . Solving this equation, we can get

$\chi_1 = \frac{k - \sqrt{k^2 + 4}}{2} = k' < 0$ ,  $\chi_2 = \frac{k + \sqrt{k^2 + 4}}{2} = k'' > 0$ . And the HMO energy levels are

$$\begin{cases} E_1 = \alpha_O - k' \beta_{NO} \\ E_2 = \alpha_O - k'' \beta_{NO} \end{cases}$$

Substituting  $\chi_1, \chi_2$  to the HMO determinant equation, and using the normalization condition, the HMO orbitals are:

$$\begin{cases} \psi_1 = \frac{1}{\sqrt{1+k'^2}} \cdot (\varphi_1 - k' \varphi_2) \\ \psi_2 = \frac{1}{\sqrt{1+k''^2}} \cdot (\varphi_1 - k'' \varphi_2) \end{cases}$$

If we assume  $k = 0.276$ , then  $k' = -0.871$ ,  $k'' = 1.147$ , so  $\begin{cases} \psi_1 = 0.754\varphi_1 + 0.657\varphi_2 \\ \psi_2 = 0.657\varphi_1 - 0.754\varphi_2 \end{cases}$ .

The pictures of MOs look like:

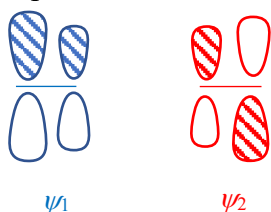

And the electron distribution of  $2\Pi_2^2$  looks like:

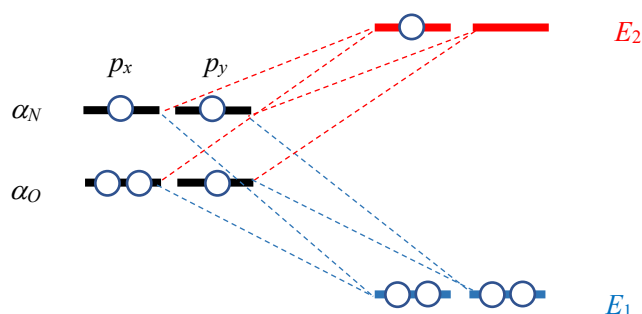

So, we can calculate the charge density of  $2\Pi_2^2$ :

$$\begin{cases} \rho_1 = 4c_{11}^2 + c_{21}^2 = 2 \times 0.754^2 + 0.651^2 = 2.705 \\ \rho_2 = 4c_{12}^2 + c_{22}^2 = 4 \times 0.657^2 + 0.754^2 = 2.295 \end{cases}$$

$$\frac{2.705}{\text{N}} \quad \frac{2.295}{\text{O}}$$

From these calculations, we can clearly see that the N atom is positively charged in  $\text{NO}_2$  whereas it is negatively charged in  $\text{NO}$ .

## 2. Supplemented Tables and Figures

**Table S1.** Comparison of adsorption energy ( $E_{ad}$ , in eV) between using full NTs and the curved NTs.

| $E_{ad}$   | (6,6) | (7,7) | (8,8) |
|------------|-------|-------|-------|
| Full-NTs   | -0.63 | -0.70 | -0.72 |
| Curved-NTs | -0.59 | -0.61 | -0.63 |

**Table S2.** The primary geometrical parameters of SnOS and SnOSe NTs.  $D_i$ : inner diameter;  $D_o$ : outer diameter;  $D$ : middle diameter (the diameter from the middle layered Sn to the center of the NTs);  $T$ : thickness;  $B_i$ : inner bond length of Sn-O;  $B_o$ : outer bond length of Sn-S/Sn-Se. All the data are in Å.

| SnOS NTs  | $D_i$ | $D_o$ | $D$   | $T$  | $B_i$  | $B_o$ |
|-----------|-------|-------|-------|------|--------|-------|
| (4, 4)    | 5.92  | 10.66 | 7.766 | 2.34 | 2.080  | 2.716 |
| (5, 5)    | 7.80  | 12.56 | 9.652 | 2.38 | 2.088  | 2.637 |
| (6, 6)    | 9.38  | 14.27 | 11.29 | 2.44 | 2.097  | 2.602 |
| (7, 7)    | 11.32 | 16.20 | 13.22 | 2.44 | 2.104  | 2.582 |
| (8, 8)    | 13.02 | 17.96 | 14.95 | 2.47 | 2.109  | 2.569 |
| (10, 10)  | 16.63 | 21.61 | 18.57 | 2.49 | 2.114  | 2.554 |
| (12, 12)  | 20.45 | 25.42 | 22.38 | 2.49 | 2.128  | 2.548 |
| (14, 14)  | 24.27 | 29.25 | 26.20 | 2.49 | 2.132  | 2.546 |
| (16, 16)  | 28.10 | 33.07 | 30.07 | 2.48 | 2.145  | 2.542 |
| (18, 18)  | 33.89 | 36.83 | 31.93 | 2.48 | 2.150  | 2.540 |
| (20, 20)  | 35.75 | 40.72 | 37.66 | 2.48 | 2.155  | 2.538 |
| (24, 24)  | 43.40 | 48.36 | 45.30 | 2.48 | 2.166  | 2.537 |
| (6, 0)    | 5.426 | 9.96  | 7.124 | 2.27 | 2.106  | 2.776 |
| (8, 0)    | 7.254 | 11.97 | 9.074 | 2.36 | 2.116  | 2.666 |
| (12, 0)   | 11.26 | 16.14 | 13.16 | 2.44 | 2.126  | 2.593 |
| (16, 0)   | 15.48 | 20.41 | 17.39 | 2.46 | 2.137  | 2.568 |
| (18, 0)   | 17.62 | 22.56 | 19.51 | 2.47 | 2.143/ | 2.558 |
| (20, 0)   | 19.74 | 24.70 | 21.62 | 2.48 | 2.145  | 2.554 |
| (22, 0)   | 21.79 | 26.77 | 23.72 | 2.49 | 2.164  | 2.549 |
| (28, 0)   | 28.42 | 33.39 | 33.39 | 2.48 | 2.157  | 2.545 |
| (32, 0)   | 32.84 | 37.80 | 34.74 | 2.48 | 2.163  | 2.539 |
| SnOSe NTs | $D_i$ | $D_o$ | $D$   | $T$  | $B_i$  | $B_o$ |
| (4, 4)    | 5.92  | 10.93 | 7.75  | 2.51 | 2.087  | 2.784 |
| (5, 5)    | 7.87  | 12.90 | 9.70  | 2.52 | 2.095  | 2.738 |
| (6, 6)    | 9.48  | 14.64 | 11.37 | 2.58 | 2.104  | 2.710 |

|          |       |       |       |      |       |       |
|----------|-------|-------|-------|------|-------|-------|
| (8, 8)   | 15.05 | 18.36 | 13.15 | 2.61 | 2.115 | 2.684 |
| (10, 10) | 17.01 | 22.23 | 18.90 | 2.61 | 2.130 | 2.676 |
| (12, 12) | 20.85 | 26.07 | 22.74 | 2.61 | 2.140 | 2.669 |
| (14, 14) | 24.73 | 29.96 | 26.63 | 2.61 | 2.150 | 2.667 |
| (16, 16) | 28.58 | 33.80 | 30.47 | 2.61 | 2.155 | 2.664 |
| (18, 18) | 32.49 | 37.70 | 34.36 | 2.61 | 2.161 | 2.662 |
| (20, 20) | 36.39 | 41.62 | 38.28 | 2.61 | 2.166 | 2.659 |
| (24, 24) | 44.82 | 49.98 | 46.66 | 2.58 | 2.198 | 2.670 |
| (6, 0)   | 5.48  | 10.25 | 7.15  | 2.38 | 2.126 | 2.871 |
| (8, 0)   | 7.35  | 12.32 | 9.14  | 2.49 | 2.128 | 2.778 |
| (10, 0)  | 9.36  | 14.43 | 11.20 | 2.54 | 2.133 | 2.732 |
| (12, 0)  | 11.48 | 16.69 | 13.34 | 2.56 | 2.141 | 2.721 |
| (14, 0)  | 13.56 | 18.73 | 15.43 | 2.58 | 2.144 | 2.694 |
| (16, 0)  | 15.74 | 20.92 | 17.61 | 2.59 | 2.151 | 2.685 |
| (20, 0)  | 20.09 | 25.30 | 21.98 | 2.61 | 2.159 | 2.689 |
| (22, 0)  | 22.39 | 27.59 | 24.26 | 2.60 | 2.166 | 2.673 |
| (24, 0)  | 24.58 | 29.79 | 26.46 | 2.60 | 2.167 | 2.669 |
| (28, 0)  | 28.98 | 34.19 | 30.85 | 2.61 | 2.173 | 2.665 |

**Table S3.** Energy levels of LUMO and HOMO of NO<sub>x</sub>.

| Gas             | LUMO (eV) | HOMO (eV) |
|-----------------|-----------|-----------|
| NO              | -4.6      | -11.2     |
| NO <sub>2</sub> | -5.2      | -6.7      |

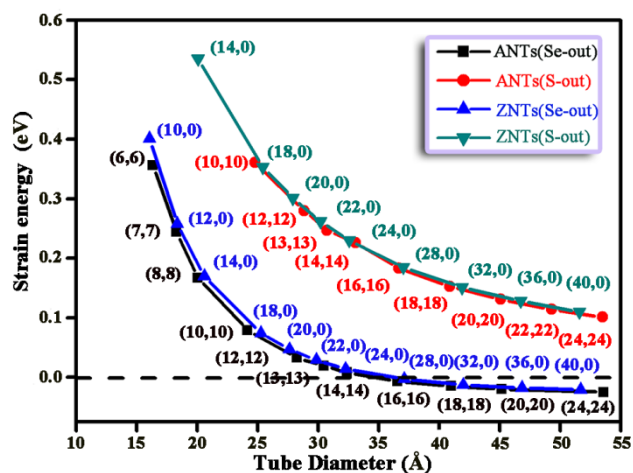

**Fig. S1** Strain energy of SnSSe NTs versus tube diameter.

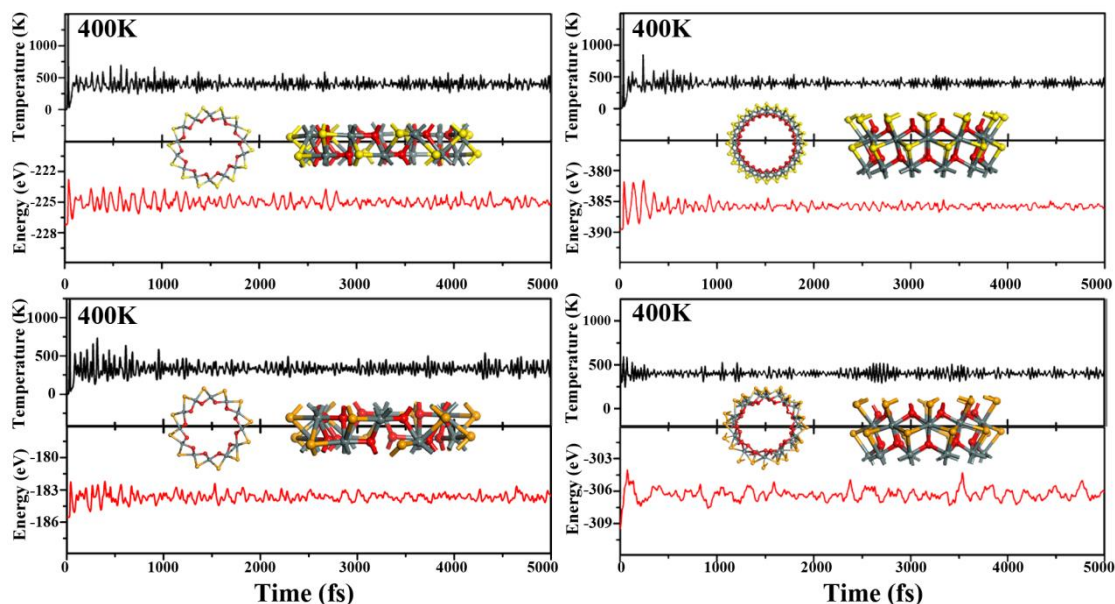

**Fig. S2** Temperature and total energy vs time for AIMD simulations of SnOS ANT, SnOS ZNT, SnOSe ANT and SnOSe ZNT. Insets show the top and side views of a snapshot of the final atomic configuration. The simulation is run at 400 K for 5 ps with a time step of 1 fs.

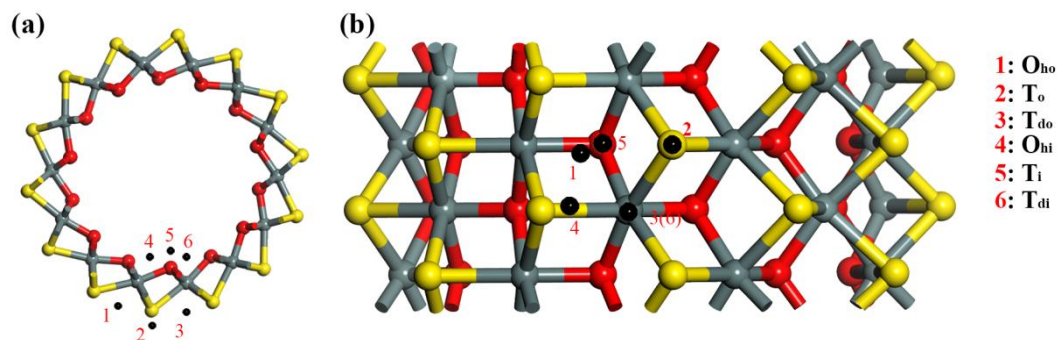

**Fig. S3** Structure of SnOS ANT from (a) top and (b) side views with possible adsorption positions for NH<sub>3</sub>, NO and NO<sub>2</sub> molecules, respectively.

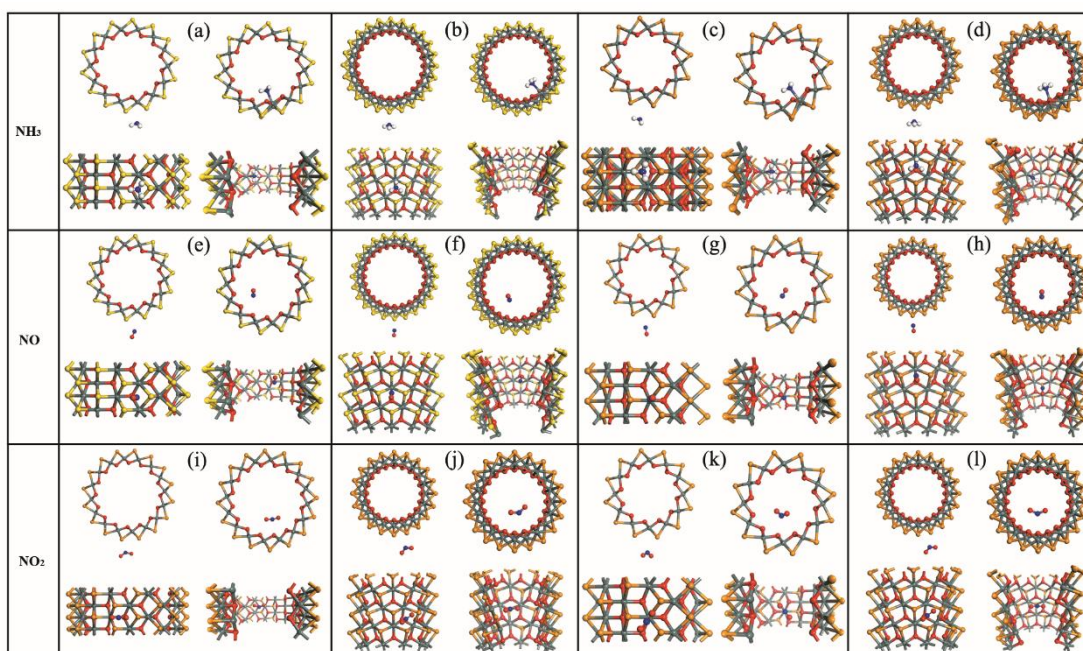

**Fig. S4** Adsorption configurations of NH<sub>3</sub>, NO and NO<sub>2</sub> on the NTs. NH<sub>3</sub> (a) - (d), NO (e) - (h), NO<sub>2</sub> (i) - (l) adsorbed on the SnOS ANT, SnOS ZNT, SnOSe ANT, and SnOSe ZNT, respectively.



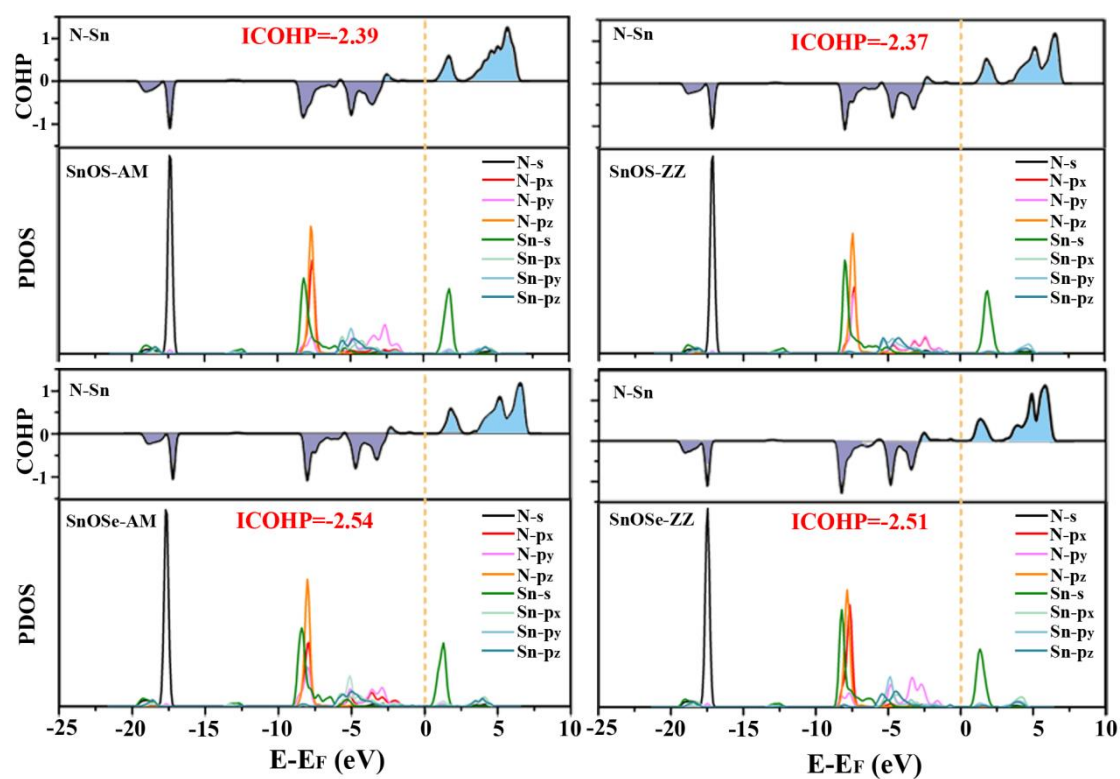

**Fig. S5** Calculated PDOS and the ICOHP of  $\text{NH}_3$  adsorbed on NTs. The bonding and antibonding states in COHP are depicted by purple and blue shaded areas, respectively. The s,  $p_x$ ,  $p_y$ ,  $p_z$  orbitals of N and Sn atom are black, red, pink, orange, olive, yellow green, green grey and dark green, respectively.

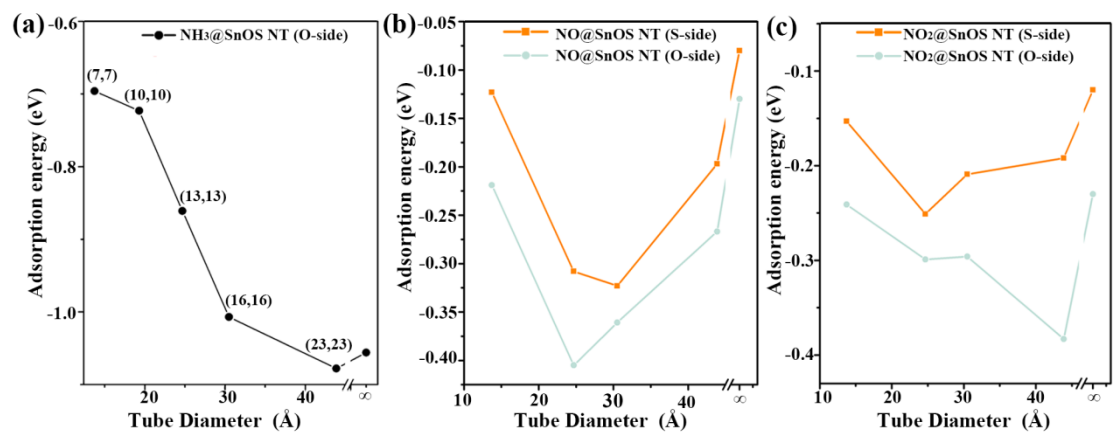

**Fig. S6** Diagram of the adsorption energy versus tube diameter.

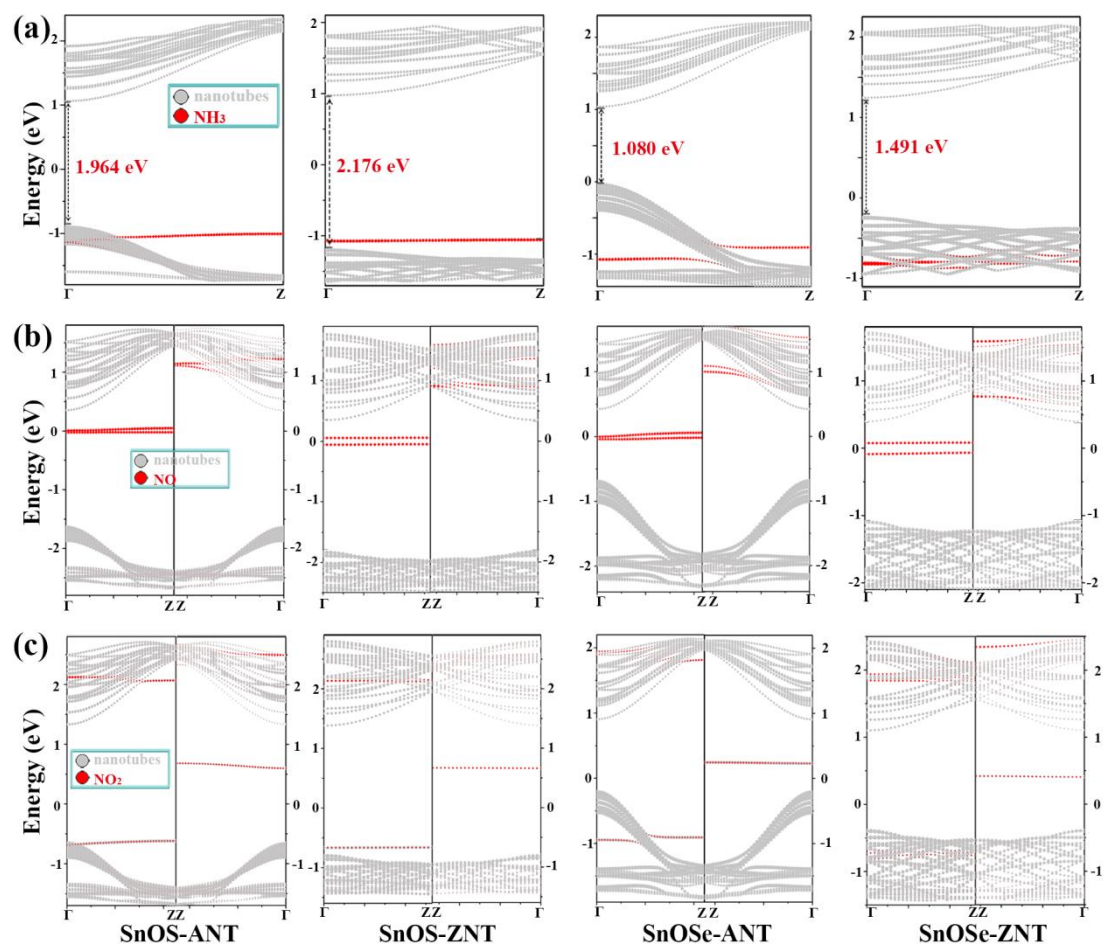

**Fig. S7** Atom-projected band structures of the  $\text{NH}_3$ - (a),  $\text{NO}$ - (b), and  $\text{NO}_2$  (c)-adsorbed on NTs. Gray and red lines represent the energy states contributed by the original nanotube and the gas molecule, respectively.
